# Supplementary material for: Metabolomics analysis reveals altered metabolites in lean compared with obese adolescents and additional metabolic shifts associated with hyperinsulinaemia and insulin resistance in obese adolescents: a cross-sectional study
Source: PubMed Central journal article supplement (PMC7803706; doi:10.1007/s11306-020-01759-y), 2021-01-12
Supplement: 11306_2020_1759_MOESM1_ESM.pdf [file 11306_2020_1759_MOESM1_ESM.pdf]

**Metabolomics analysis reveals altered metabolites in lean compared with obese adolescents and additional metabolic shifts associated with hyperinsulinaemia and insulin resistance in obese adolescents: a cross-sectional study**

Elisabeth Müllner, Hanna E. Röhnisch, Claudia von Brömssen, Ali A. Moazzami\*

\*Corresponding author: [Ali.Moazzami@slu.se](mailto:Ali.Moazzami@slu.se); Department of Molecular Sciences, Swedish University of Agricultural Sciences, Uppsala, Sweden

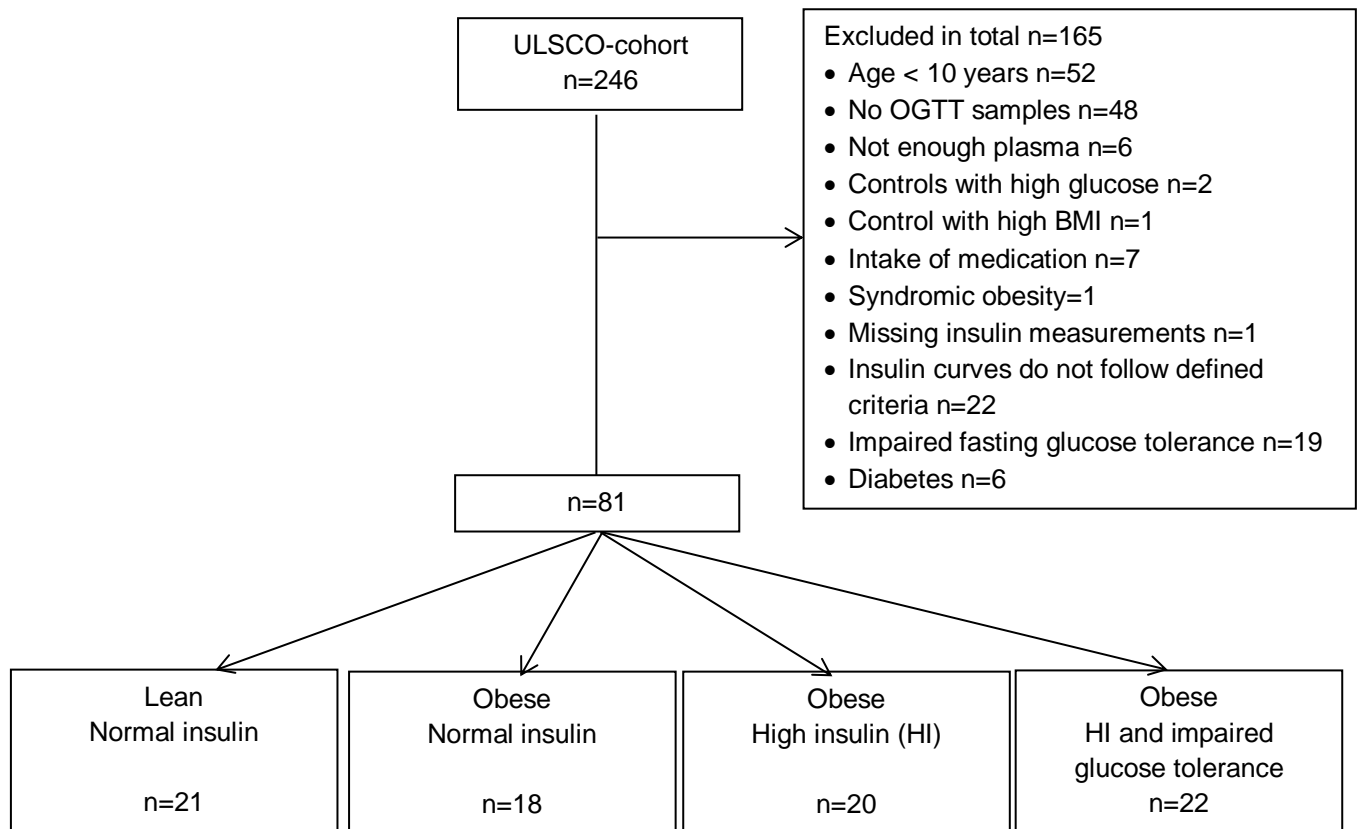

**Online Resource 1:** Flow chart illustrating the in- and exclusion of adolescents in the metabolomics study.
